# Supplementary material for: A First-Principles Study on Hydrogen Sensing Properties of Pristine and Mo-Doped Graphene
Source: Hindawi journal article supplement (doi:10.1155/2018/2031805), 2018-09-05
Supplement: f1 [file 2031805.f1.doc]

**A first-principles study on hydrogen sensing properties of pristine and Mo-doped graphene**

Shulin Yanga, Zhigao Lana*, Huoxi Xua, Gui Leia, Wei Xiea, Qibin Gub*

aSchool of Electronic Information, Hubei Key Laboratory for Processing and Application of Catalytic Materials, Huanggang Normal Univerisity, Huanggang 438000, P.R. China.

bDepartment of Architecture and Material Engineering, Hubei University of Education, Wuhan, 430205, P.R. China.

*Corresponding author: Tel.: +86 713 853 8398

E-mail address: [lanzhg@hgnu.edu.cn](mailto:lanzhg@hgnu.edu.cn) (Z. Lan), [gqibin@hue.edu.cn](mailto:gqibin@hue.edu.cn) (Q. Gu)...


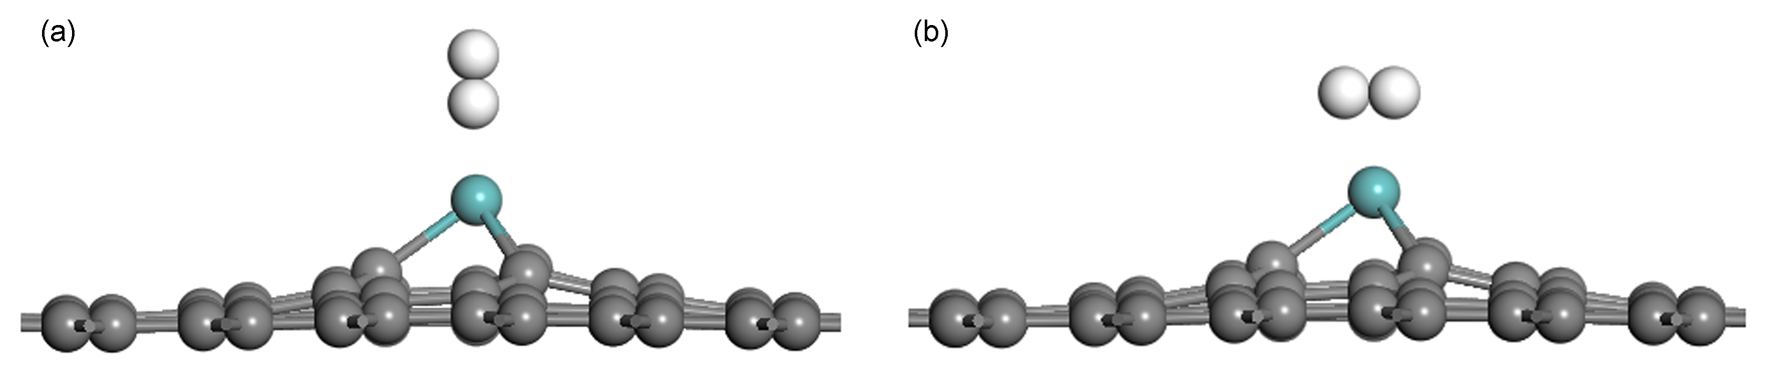


**Fig. S1** Initial structures of a H2 molecule adsorbed on the Mo-doped graphene: (a) with H2 perpendicular to Mo doped graphene surface (M1); (b) with H2 parallel along X axis to Mo-doped graphene surface (M2).


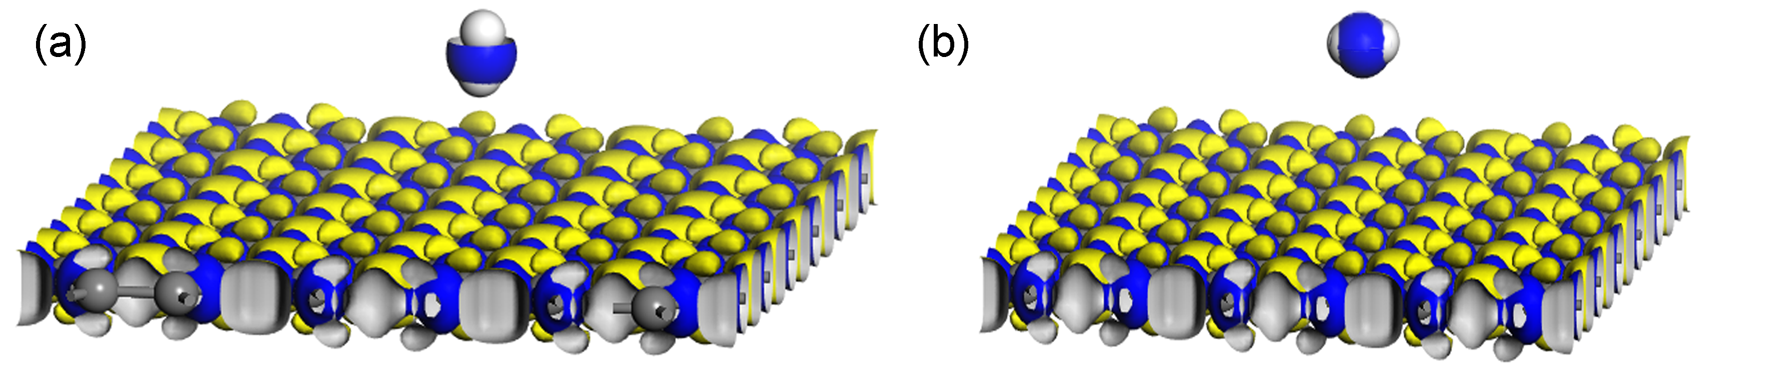


**Fig. S2** The plots of the deformation electron density for V1 and V2 modes (Blue color: electron-trap; Yellow color: electron-release).


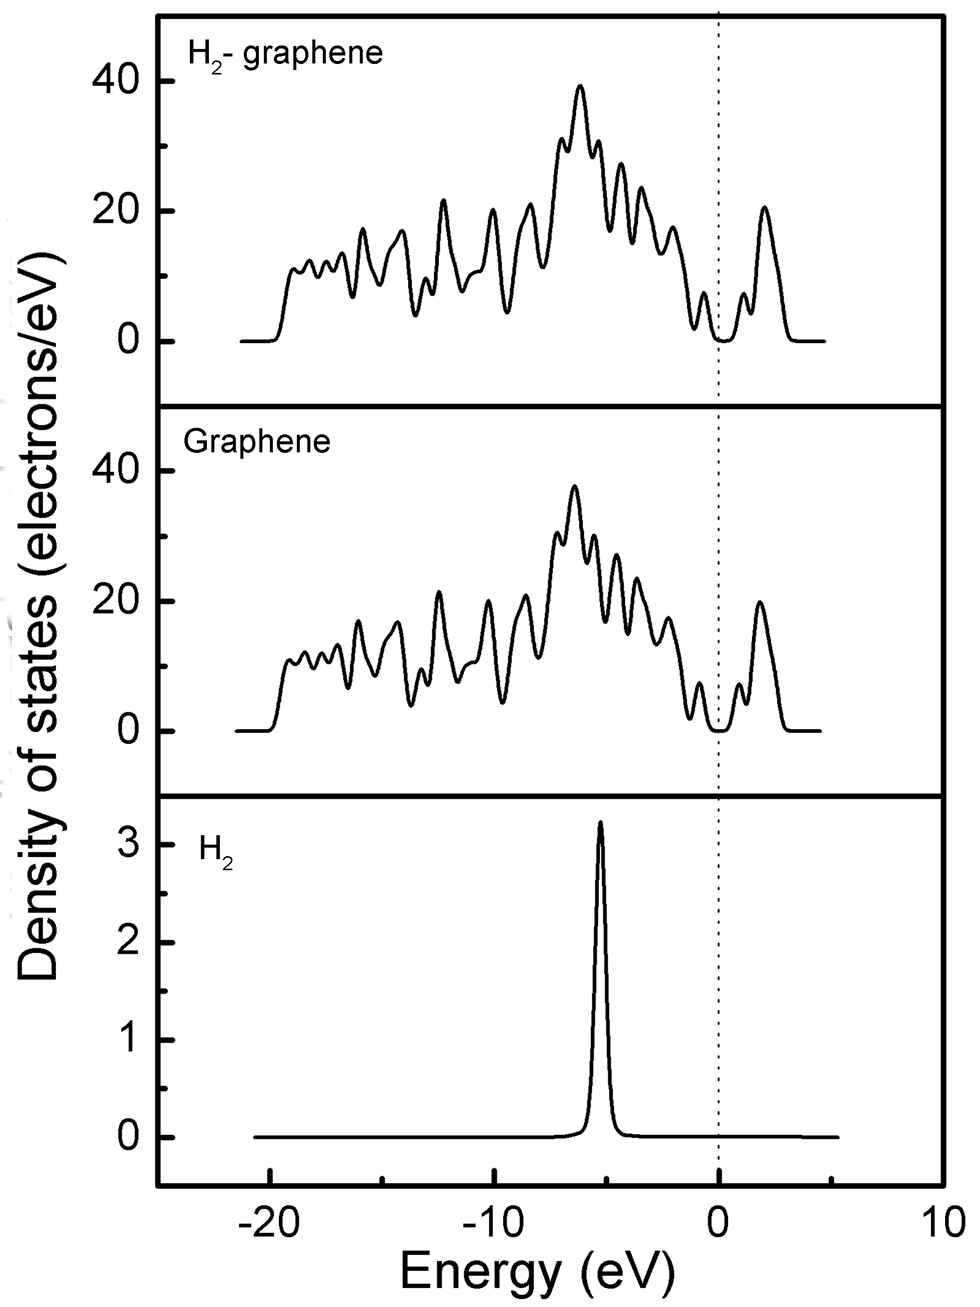


**Fig. S3** The electronic density of state (DOS) for H2-graphene system (Mode V2)


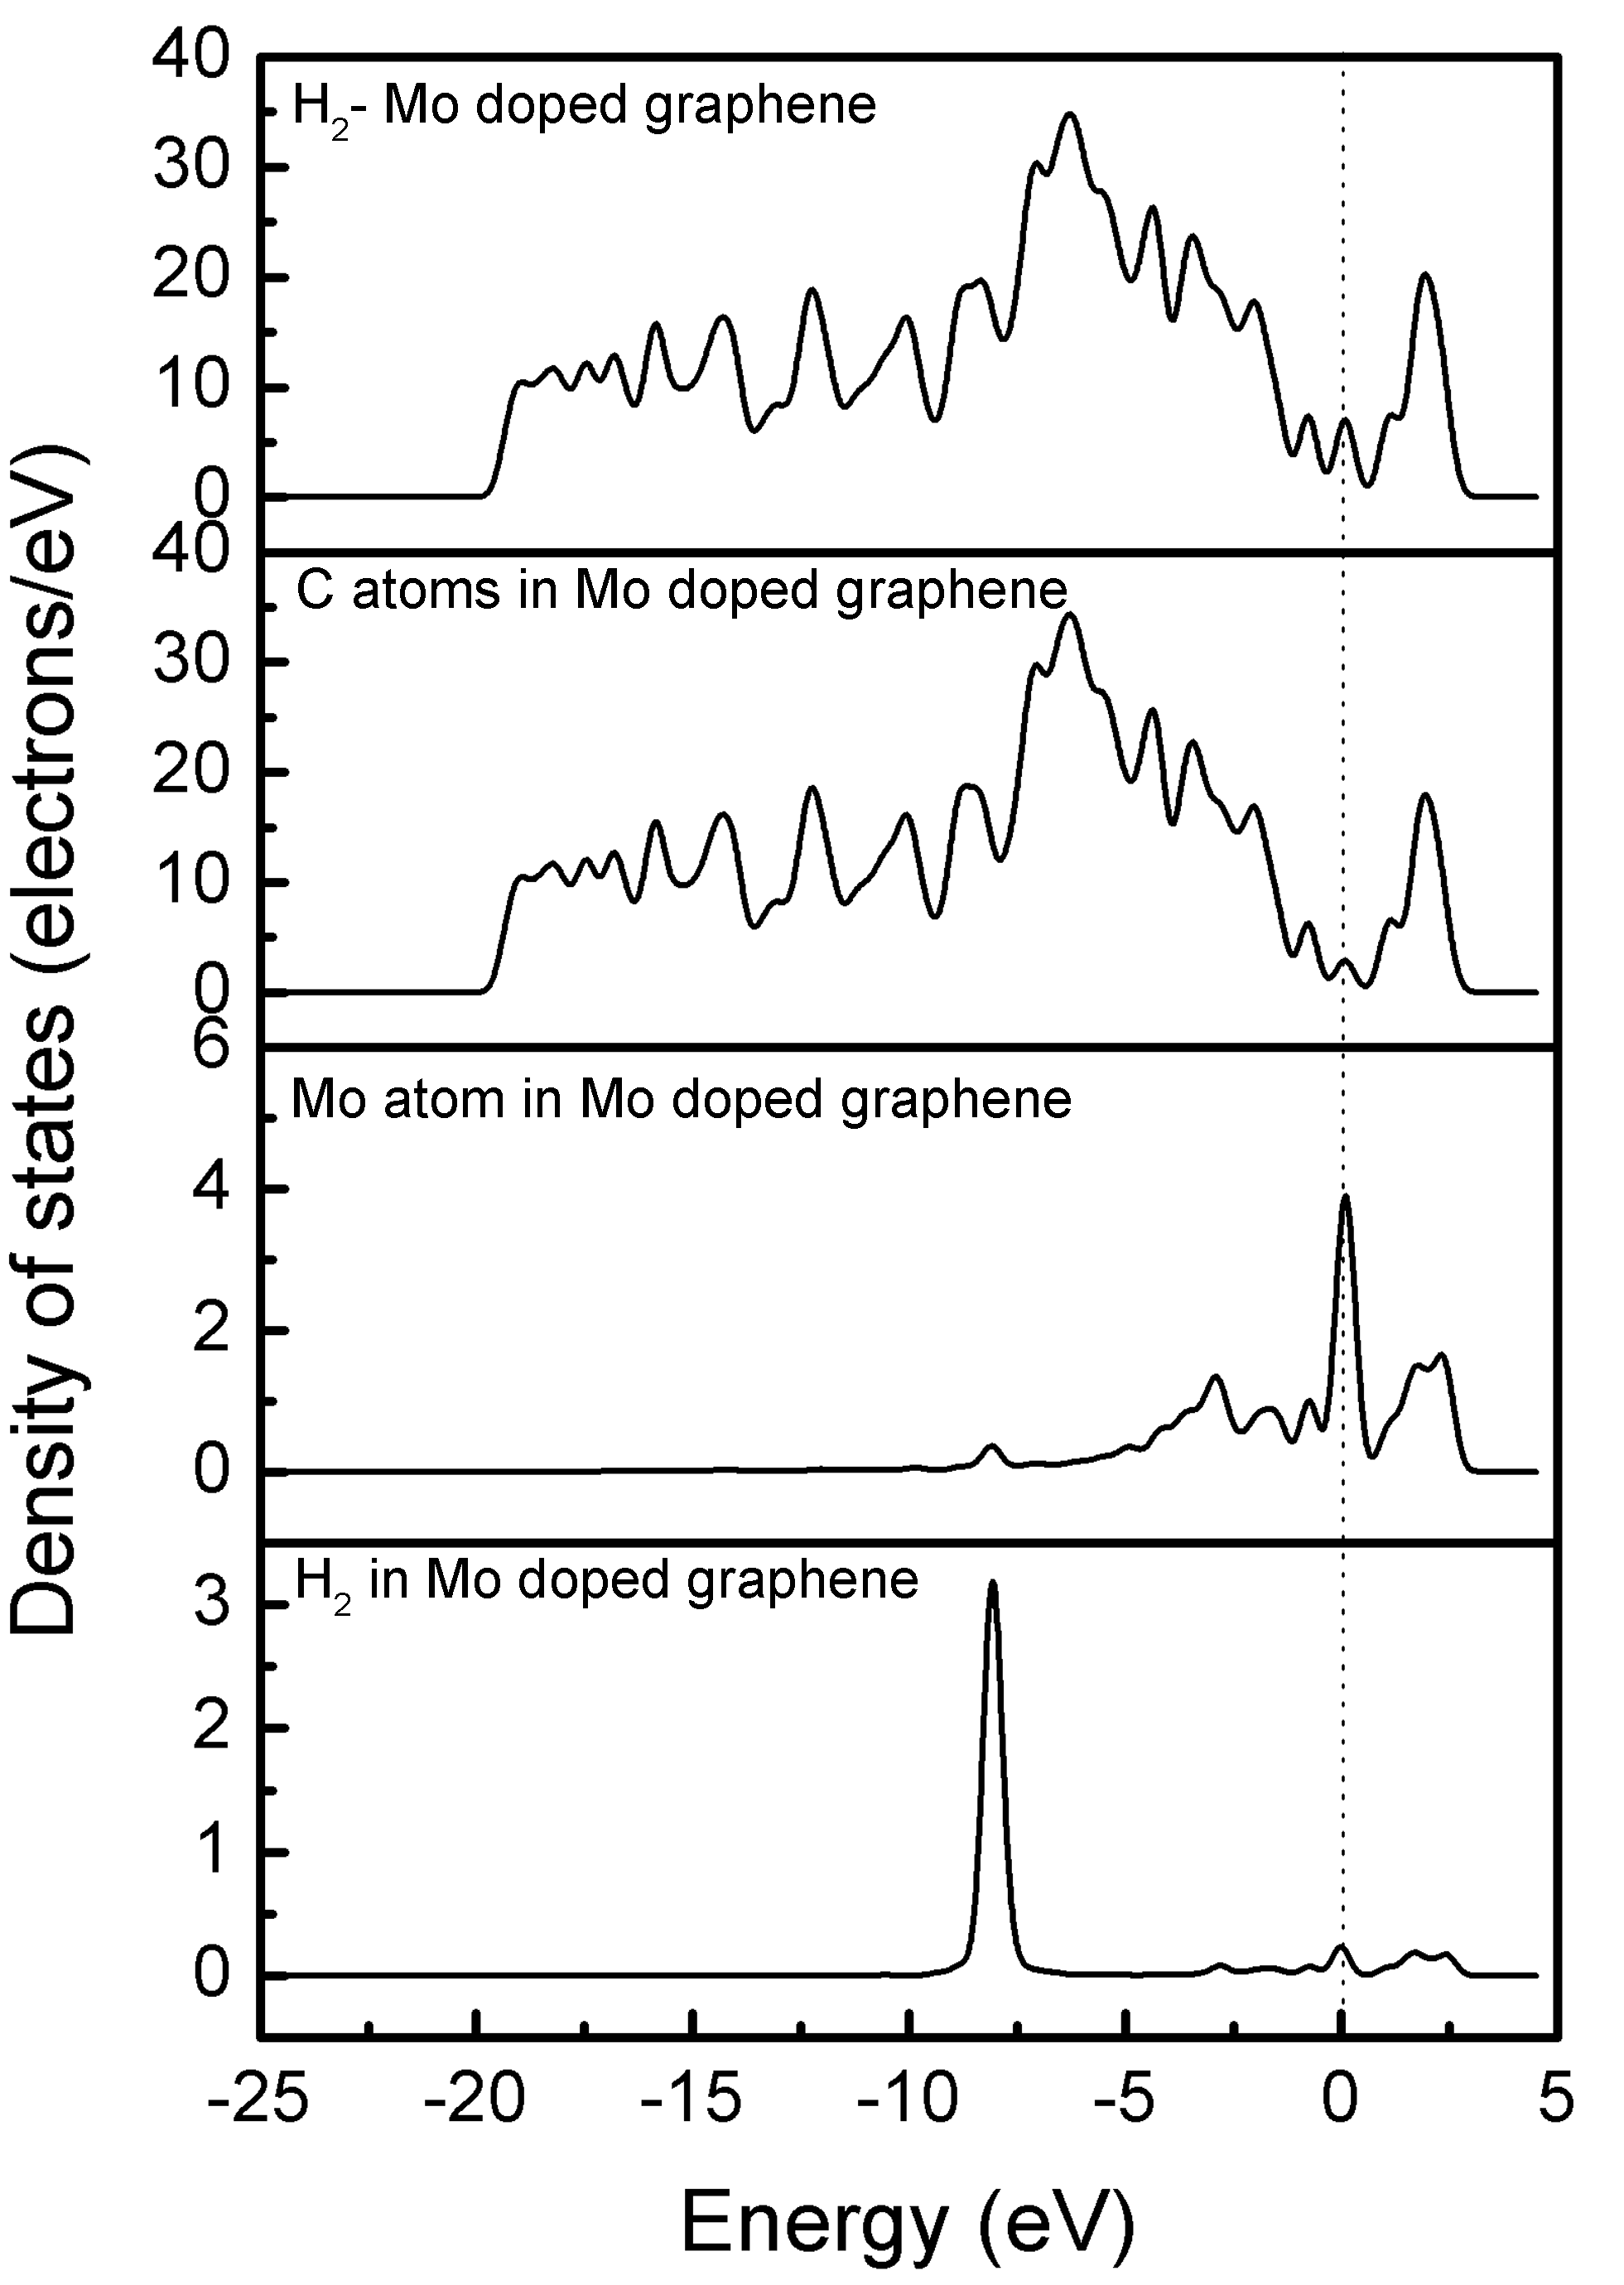


**Fig. S4** The electronic density of state (DOS) for H2-Mo-doped graphene system (Mode M2) with preferred configuration
